# Supplementary material for: Selection and Validation of Reliable Reference Genes for qRT-PCR Normalization of Bursaphelenchus xylophilus from Different Temperature Conditions and Developmental Stages
Source: MDPI journal article supplement (doi:10.3390/app12062880), 2022-03-11
Supplement: s1 [file s1]

# Selection and Validation of Reliable Reference Genes for qRT-PCR Normalization of *Bursaphelenchus xylophilus* from Different Temperature Conditions and Developmental Stages

Yajing Wu <sup>1,2,3,†</sup>, Jiao Zhou <sup>2,†</sup>, Yaning Liu <sup>2</sup>, Yutong Gu <sup>2</sup>, Hongxia Zhang <sup>2</sup>, Faheem Ahmad <sup>4</sup>, Guochang Wang <sup>3,\*</sup> and Lili Ren <sup>1,5\*</sup>

<sup>1</sup> Science and Technology Research Center of China Customs, Beijing 100026, China; wyjds@163.com

<sup>2</sup> State Key Laboratory of Integrated Management of Pest Insects and Rodents, Institute of Zoology, Chinese Academy of Sciences, Beijing 100101, China; zhoujiao@ioz.ac.cn (J.Z.); liuyanling6206@126.com (Y.L.); gyt715166463@163.com (Y.G.); zhanghx@ioz.ac.cn (H.Z.)

<sup>3</sup> School of Resources and Environment, Henan Institute of Science and Technology, Xinxiang 453003, China

<sup>4</sup> Department of Biosciences, COMSATS University Islamabad (CUI), Park Road, Tarlai Kalan 45550 ICT, Islamabad, Pakistan; faheem.ahmad@comsats.edu.pk

<sup>5</sup> Institute of Inspection Technology and Equipment, Chinese Academy of Inspection and Quarantine, Beijing 100029, China;

\* Correspondence: wgchslbh@163.com (G.W.); renll2021@163.com (L.R.)

† These authors have contributed equally to this work.

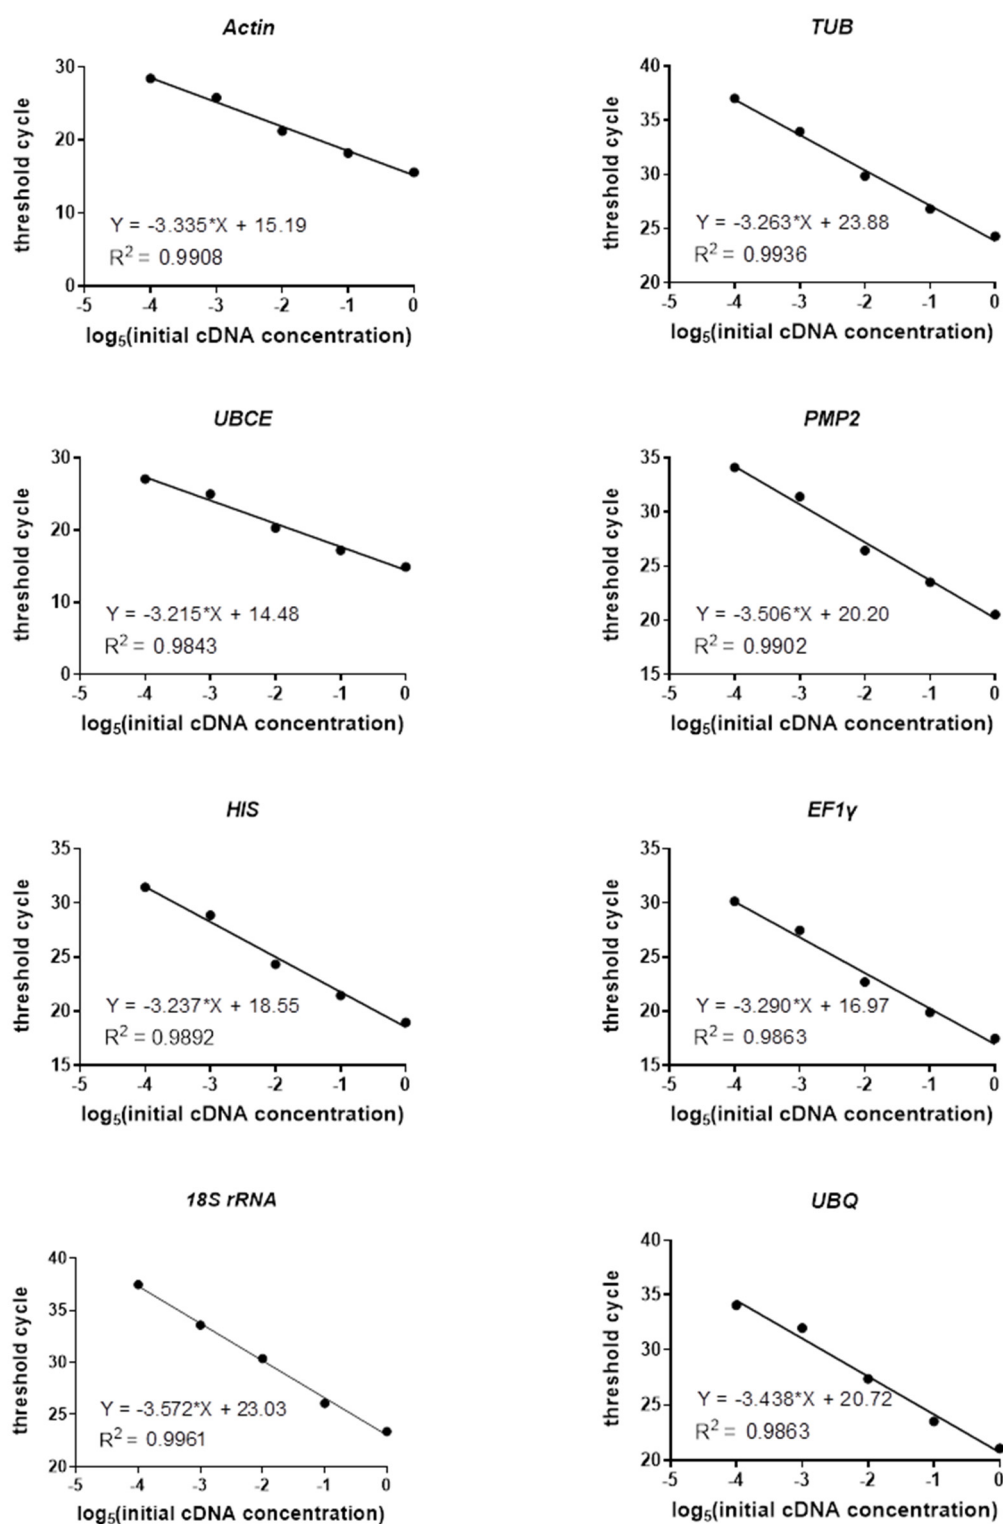

**Figure S1.** Standard curves of eight candidate reference genes. Line relations and determination coefficient ( $R^2$ ) between Ct values and Log quantity were calculated by SPSS 22.0 software.
